# Supplementary material
Source: publisher site journal article supplement (https://www.dovepress.com/article/329980)
Supplement: Supplementary file 1 [file get_supplementary_file.php]

**Supplementary materials**

| **Country** | **Reference** | **Sample** | **GEO** | **Platform** | **ICM** | **NF** |
| --- | --- | --- | --- | --- | --- | --- |
| Aurora, CO, USA | Sweet ME et al. (2018) | Human left ventricular myocardial tissue | GSE116250 | GPL16791 | 13 | 14 |
| St. Louis, MO, USA | Yang KC et al. (2014) | Human left ventricular myocardial tissue | GSE46224 | GPL11154 | 8 | 8 |
| Philadelphia, PA, USA | Hannenhalli S  et al. (2006) | Human left ventricular myocardial tissue | GSE5406 | GPL96 | 108 | 16 |

**Supplementary table 1：Characteristics of datasets in ICM patients**

**Supplementary table 2: The top 10 hub genes identified in protein-protein interaction (PPI) network of GSE116250 dataset.**

| **Gene** | **Description** | **Node** |
| --- | --- | --- |
| COL1A1 | Collagen alpha-1(I) chain | 38 |
| COL3A1 | Collagen alpha-1(III) chain | 34 |
| COL1A2 | Collagen alpha-2(I) chain | 28 |
| MMP2 | matrix metalloproteinase-2 | 40 |
| BGN | Biglycan | 28 |
| COL5A1 | Collagen alpha-1(V) chain | 25 |
| CTGF | Connective tissue growth factor | 27 |
| LUM | Lumican | 21 |
| FMOD | Fibromodulin | 22 |
| PENK | Proenkephalin | 21 |

**Supplementary table 3: The top 10 hub genes identified in protein-protein interaction (PPI) network of GSE46224 dataset.**

| **Gene** | **Description** | **Node** |
| --- | --- | --- |
|  |  |  |
| COL1A1 | Collagen alpha-1(I) chain | 28 |
| COL3A1 | Collagen alpha-1(III) chain | 24 |
| COL1A2 | Collagen alpha-2(I) chain | 21 |
| BGN | Biglycan | 20 |
| LUM | Lumican | 14 |
| POSTN | Periostin | 22 |
| THBS2 | Thrombospondin-2 | 17 |
| FMOD | Fibromodulin | 17 |
| CTGF | Connective tissue growth factor | 13 |
| COL16A1 | Collagen alpha-1(XVI) chain | 8 |

**Supplementary table 4: The top 10 hub genes identified in protein-protein interaction (PPI) network of GSE5406 dataset.**

| **Gene** | **Description** | **Node** |
| --- | --- | --- |
| COL3A1 | Collagen alpha-1(III) chain | 7 |
| COL1A2 | Collagen alpha-2(I) chain | 6 |
| OGN | Osteoglycin | 4 |
| LUM | Lumican | 3 |
| ASPN | Asporin | 3 |
| FLNC | Filamin C | 3 |
| MYOT | Myotilin | 3 |
| MYH6 | Myosin heavy chain 6 | 4 |
| SERPINE1 | Serpin family E member 1 | 3 |
| PTX3 | Pentraxin 3 | 3 |

**Supplementary table 5: Baseline clinical characteristics of patients.**

|  | Normal (n=2) | ICM(n=4) |
| --- | --- | --- |
| Age | 52.25±4.732 | 56.00±4.473 |
| LVEF | 69.00±0.408 | 28.75±4.608 |
| LVEDD | 45.50±2.901 | 62.75±2.78 |
| LVEDs | 33.5±1.936 | 52±4.528 |

**Supplementary table 6: Primer sequences for real-time PCR.**

| Primer name | sequence |
| --- | --- |
| SERPINA3-forward | CTTCACCAGCAAGGCTGACC |
| SERPINA3-reverse | GCACAGCCTTATGGACCACC |
| FCN3-forward | TTGTCCTCCTGCCCAGTT |
| FCN3-reverse | GATCTCCTGGCTCACCCTT |
| LUM-forward | CAGACTGCCTTCTGGTCTCC |
| LUM-reverse | GCTCAACCAGGGATGACAC |
| COL1A2-forward | GAGACCCTTCTTACTCCTGAA |
| COL1A2-reverse | GTGATGTTCTGAGAGGCATAG |
| ASPN-forward | TTTAGCCCTTCACACATCGC |
| ASPN-reverse | TGGTTGGGACTGAGGTCAAA |
| HBB-forward | CCCAGAGGTTCTTTGAGTC |
| HBB-reverse | TGAGGTTGTCCAGGTGAG |
| COL3A1-forward | TCTTGGTCAGTCCTATGCGGATA |
| COL3A1-reverse | CATCGCAGAGAACGGATCCT |
| MXRA5-forward | CCTTGTGCCTGCTACGTCC |
| MXRA5-reverse | TTGGTCAGTCCTGCAAATGAG |
